# Supplementary material
Source: PubMed Central journal article supplement (PMC7108895)
Supplement: jci-130-129204-s008.pdf [file jci-130-129204-s008.pdf]

Vago and Gojo, Immune Escape and Immunotherapy of AML  
Supplementary Table 1 and 2

| Supplementary Table 1. Antibodies in clinical testing in AML |               |                                                                                                                                                                                                                                                                                                                                                                                                                                                                                                                                                                      |                                                                                                                                                                                                                                                                                                                                                                                                                                                                                                                                                                                                                                                                                                                                                                                                                                                                                                                                                                 |                                                                                                                                                                                                                                     |
|--------------------------------------------------------------|---------------|----------------------------------------------------------------------------------------------------------------------------------------------------------------------------------------------------------------------------------------------------------------------------------------------------------------------------------------------------------------------------------------------------------------------------------------------------------------------------------------------------------------------------------------------------------------------|-----------------------------------------------------------------------------------------------------------------------------------------------------------------------------------------------------------------------------------------------------------------------------------------------------------------------------------------------------------------------------------------------------------------------------------------------------------------------------------------------------------------------------------------------------------------------------------------------------------------------------------------------------------------------------------------------------------------------------------------------------------------------------------------------------------------------------------------------------------------------------------------------------------------------------------------------------------------|-------------------------------------------------------------------------------------------------------------------------------------------------------------------------------------------------------------------------------------|
| Type of antibody                                             | Target        | Antibody Target(s)                                                                                                                                                                                                                                                                                                                                                                                                                                                                                                                                                   | Clinical Outcome/ Status                                                                                                                                                                                                                                                                                                                                                                                                                                                                                                                                                                                                                                                                                                                                                                                                                                                                                                                                        |                                                                                                                                                                                                                                     |
| Naked mAb                                                    | CD33          | <b>Lintuzumab</b> - multiple studies, phase I-III, single agent and in combination with HMA, LDAC or intensive chemotherapy, clinical development stopped<br><b>BI 836858</b><br>NCT01690624-single agent, phase I, completed; R/R or high risk for relapse AML;<br><b>NCT02632721 -plus decitabine, phase I/II, active, not recruiting; untreated ≥65 yr and R/R AML</b><br><b>NCT03207191-plus F16IL2, phase I; recruiting, relapsed AML after alloHSCT</b><br><b>NCT03013998, BAML-16-001-S2- plus azacitidine- phase I//II, recruiting; untreated AML ≥60 yr</b> | Limited activity, toxicity<br><br>Data not reported<br><b>Study ongoing</b><br><b>Study ongoing</b><br><b>Study ongoing</b>                                                                                                                                                                                                                                                                                                                                                                                                                                                                                                                                                                                                                                                                                                                                                                                                                                     |                                                                                                                                                                                                                                     |
|                                                              | CD123         | <b>CSL360</b> –single agent, phase I, completed; R/T and high risk AML<br><b>CSL-362 (talacotuzumab)</b> -single agent, phase I, AML in remission; plus decitabine, phase II/III, untreated AML ≥65 yrs, clinical development stopped<br><b>KHK2823</b> - single agent, phase I, terminated; untreated AML, R/R AML and high risk MDS                                                                                                                                                                                                                                | Limited activity<br>Limited activity<br><br>Limited activity                                                                                                                                                                                                                                                                                                                                                                                                                                                                                                                                                                                                                                                                                                                                                                                                                                                                                                    |                                                                                                                                                                                                                                     |
|                                                              | CD44          | <b>RG7356</b><br>NCT01641250-single agent, phase I, completed; R/R AML; untreated, unfit AML                                                                                                                                                                                                                                                                                                                                                                                                                                                                         | Limited activity                                                                                                                                                                                                                                                                                                                                                                                                                                                                                                                                                                                                                                                                                                                                                                                                                                                                                                                                                |                                                                                                                                                                                                                                     |
|                                                              | CD47          | <b>Hu5F9-G4</b><br>NCT02678338-single agent, phase I, completed; R/R AML and high-risk AML<br><b>NCT03248479-single agent and plus azacitidine, phase I, recruiting; untreated and R/R AML</b><br><b>NCT03922477-plus atezolizumab (anti-PD-L1), phase IB, recruiting; R/R AML</b><br><b>CC-90002</b> -single agent, phase I, terminated; R/R AML and high-risk MDS                                                                                                                                                                                                  | Data not reported<br><b>Study ongoing</b><br><b>Study ongoing</b><br>Limited activity                                                                                                                                                                                                                                                                                                                                                                                                                                                                                                                                                                                                                                                                                                                                                                                                                                                                           |                                                                                                                                                                                                                                     |
|                                                              | CD38          | <b>Daratumumab</b><br>NCT03067571-single agent, phase II, recruiting; R/R AML and high-risk MDS<br>NCT02807558-plus SY-1425 (temibarotene), phase II, recruiting; R/R AML and high-risk MDS                                                                                                                                                                                                                                                                                                                                                                          | <b>Study ongoing</b><br><b>Study ongoing</b>                                                                                                                                                                                                                                                                                                                                                                                                                                                                                                                                                                                                                                                                                                                                                                                                                                                                                                                    |                                                                                                                                                                                                                                     |
|                                                              | CD70          | <b>ARGX-110 (cusatuzumab)</b><br>NCT03030612-plus azacitidine, phase I/II, active, not recruiting; untreated AML / high-risk MDS                                                                                                                                                                                                                                                                                                                                                                                                                                     | <b>Study ongoing;</b><br>Promising early activity                                                                                                                                                                                                                                                                                                                                                                                                                                                                                                                                                                                                                                                                                                                                                                                                                                                                                                               |                                                                                                                                                                                                                                     |
|                                                              | CD157 (BST-1) | <b>MEN1112</b><br>NCT02353143- single agent, phase I, recruiting; R/R AML                                                                                                                                                                                                                                                                                                                                                                                                                                                                                            | <b>Study ongoing</b>                                                                                                                                                                                                                                                                                                                                                                                                                                                                                                                                                                                                                                                                                                                                                                                                                                                                                                                                            |                                                                                                                                                                                                                                     |
|                                                              | CD184 (CXCR4) | <b>BMS-936564 (ulocuplumab)</b><br>NCT02300563 – plus LDAC, phase I, terminated; untreated AML<br>NCT01120457- plus MEC, phase I, completed; R/R AML                                                                                                                                                                                                                                                                                                                                                                                                                 | Slow accrual, terminated<br>Promising activity                                                                                                                                                                                                                                                                                                                                                                                                                                                                                                                                                                                                                                                                                                                                                                                                                                                                                                                  |                                                                                                                                                                                                                                     |
|                                                              | ADC           | CD25                                                                                                                                                                                                                                                                                                                                                                                                                                                                                                                                                                 | <b>ADCT 301 (camidanlumab tesirine)</b> (PBD conjugated)<br>NCT02588092-single agent, phase I, completed; CD25+ R/R AML and ALL                                                                                                                                                                                                                                                                                                                                                                                                                                                                                                                                                                                                                                                                                                                                                                                                                                 | Limited activity                                                                                                                                                                                                                    |
|                                                              |               | CD33                                                                                                                                                                                                                                                                                                                                                                                                                                                                                                                                                                 | <b>Gemtuzumab ozogamycin (GO; Mylotarg)</b> (calicheamicin conjugated)<br>NCT03737955- single agent, phase II, recruiting; AML MRD<br>NCT02473146-plus 7+3, phase II/III (ALFA1401), recruiting; untreated AML ≥60-80 yr<br>NCT03904251-plus CPX-351, phase I, recruiting; relapsed AML<br>NCT03839446-plus ME (MEGO), phase II, recruiting; primary refractory AML<br>NCT02221310-plus Bu/CY pre-Allo-HSCT, phase II, recruiting; high risk CD33+ AML/MDS<br>NCT03727750-single agent, phase IV, recruiting; R/R CD33+ AML (QTc, PK, safety)<br><b>SGN-CD33A (vadastuximab talirine)</b> (PBD conjugated)-several studies, phase I-III, single agent and in combination with HMA or induction chemotherapy, clinical development stopped – higher rate of deaths and fatal infections in the SGN33A versus the control arm (NCT02785900)<br><b>IMGN779</b> (indolino-benzodiazepine conjugated)<br>NCT02674763-single agent, phase I, completed; R/R CD33+ AML | <b>FDA approved</b><br><b>Study ongoing</b><br><b>Study ongoing</b><br><b>Study ongoing</b><br><b>Study ongoing</b><br><b>Study ongoing</b><br><b>Study ongoing</b><br>Liver (SOS/VOD) and other toxicities<br><br>Limited activity |
| CD123                                                        |               | <b>SGN-CD123A</b> (PBD conjugated)<br>NCT02848248-single agent, phase I, terminated; R/R AML<br><b>IMGN632</b> (indolino-benzodiazepine conjugated)<br>NCT03386513-single agent, phase I, recruiting; R/R CD123+ AML, BPDEN, ALL                                                                                                                                                                                                                                                                                                                                     | Data not reported<br><br><b>Study ongoing,</b><br>early activity                                                                                                                                                                                                                                                                                                                                                                                                                                                                                                                                                                                                                                                                                                                                                                                                                                                                                                |                                                                                                                                                                                                                                     |
| CD135 (FLT3)                                                 |               | <b>ASP1235 (AGS62P1)</b> (microtubule targeting agent- AGL-0182-30)<br>NCT02864290 – single agent, phase I, recruiting; R/R AML                                                                                                                                                                                                                                                                                                                                                                                                                                      | <b>Study ongoing</b>                                                                                                                                                                                                                                                                                                                                                                                                                                                                                                                                                                                                                                                                                                                                                                                                                                                                                                                                            |                                                                                                                                                                                                                                     |
| ATC                                                          |               | CD33                                                                                                                                                                                                                                                                                                                                                                                                                                                                                                                                                                 | <b>HuM195/rGel</b><br>NCT00038051-single agent, phase I, completed; R/R AML, high-risk MDS, CMML or CML                                                                                                                                                                                                                                                                                                                                                                                                                                                                                                                                                                                                                                                                                                                                                                                                                                                         | Limited activity                                                                                                                                                                                                                    |
|                                                              | CD123         | <b>SL-401 (tagraxofusp)</b> -FDA approved for BPDEN<br>NCT03113643-plus azacitidine+/-venetoclax, phase I, recruiting; R/R AML and untreated unfit AML/high risk MDS<br>NCT02270463-single agent, phase I/II, active, not recruiting; adverse-risk AML in CR1                                                                                                                                                                                                                                                                                                        | <b>Study ongoing</b><br><br><b>Study ongoing</b>                                                                                                                                                                                                                                                                                                                                                                                                                                                                                                                                                                                                                                                                                                                                                                                                                                                                                                                |                                                                                                                                                                                                                                     |
| RIC                                                          | CD33          | <b>Lintuzumab-Ac225</b><br>NCT03441048–plus CLAG-M, phase I, recruiting; R/R AML<br>NCT03867682-plus venetoclax, phase I/II, not yet recruiting; R/R AML                                                                                                                                                                                                                                                                                                                                                                                                             | <b>Study ongoing</b><br><b>Planned</b>                                                                                                                                                                                                                                                                                                                                                                                                                                                                                                                                                                                                                                                                                                                                                                                                                                                                                                                          |                                                                                                                                                                                                                                     |

Vago and Gojo, Immune Escape and Immunotherapy of AML  
Supplementary Table 1 and 2

|                                        |              |                                                                                                                                                                                                                                                                                                                                                                                                                                                                                                                                                                                                 |                                                                                                                 |
|----------------------------------------|--------------|-------------------------------------------------------------------------------------------------------------------------------------------------------------------------------------------------------------------------------------------------------------------------------------------------------------------------------------------------------------------------------------------------------------------------------------------------------------------------------------------------------------------------------------------------------------------------------------------------|-----------------------------------------------------------------------------------------------------------------|
|                                        | <b>CD45</b>  | <p><b><i>Iomab-B</i> (<sup>131</sup>I; <i>apamistamab</i>)</b><br/> <b>NCT0266565 (SIERRA)</b>-plus Flu/2Gy-TBI, phase III, recruiting; active AML pre-alloHSCT<br/> <b>NCT00589316</b> –plus Cy/Flu/2 Gy-TBI, posttransplant Cy-haploidentical transplant; phase I, active not recruiting; AML and high-risk MDS<br/> <b>211A+BC8-B10</b><br/> <b>NCT03670966</b>- plus Cy/Flu/2 Gy-TBI, posttransplant Cy-haploidentical transplant; phase I/II, recruiting; AML, high-risk MDS, and ALL<br/> <b>NCT03128034</b>-plus Flu/2-3Gy-TBI, phase I/II, recruiting; advanced AML, MDS, ALL, MPAL</p> | <p><b>Study ongoing</b><br/> <b>Study ongoing</b></p> <p><b>Study ongoing</b></p> <p><b>Study ongoing</b></p>   |
| <b>T or NK cell engager antibodies</b> | <b>CD33</b>  | <p><b>AMG 330 (Bi-specific Ab; CD33 x CD3)</b><br/> <b>NCT02520427</b>-single agent, phase I, recruiting; R/R AML<br/> <b>AMV-564 (Tandem diabody; CD33 x CD3)</b><br/> <b>NCT03144245</b>-single agent, phase I, recruiting; R/R AML<br/> <b>AMG 673 (Bi-specific Ab; CD33 x CD3)</b><br/> <b>NCT03224819</b>- single agent, phase I, recruiting; R/R AML</p>                                                                                                                                                                                                                                  | <p><b>Study ongoing</b></p> <p><b>Study ongoing</b></p> <p><b>Study ongoing</b></p>                             |
|                                        | <b>CD123</b> | <p><b>JNJ-63709178 (Duobody; CD123 x CD3)</b><br/> <b>NCT02715011</b>-single agent, phase I, recruiting; R/R AML<br/> <b>MGD006 (flotetuzumab) (DART; CD123 X CD3)</b><br/> <b>NCT02152956</b>- single agent, phase I/II, recruiting; R/R AML and intermediate / high risk MDS<br/><br/> <b>XmAb14045 (Bispecific Ab; CD123 X CD3)</b><br/> <b>NCT02730312</b>-single agent, phase I, recruiting; CD123+ AML, ALL, CML, BPDCN</p>                                                                                                                                                               | <p><b>Study ongoing</b></p> <p><b>Study ongoing, activity in refractory AML</b></p> <p><b>Study ongoing</b></p> |
|                                        | <b>CLL-1</b> | <p><b>MCLA-117 (Duobody; CLEC12A (CLL-1) x CD3)</b><br/> <b>NCT03038230</b>-single agent, phase I, recruiting; R/R AML, untreated poor risk older AML</p>                                                                                                                                                                                                                                                                                                                                                                                                                                       | <p><b>Study ongoing</b></p>                                                                                     |
|                                        | <b>CD33</b>  | <p><b>CD16/IL-15/CD33 (TriKE)</b><br/> <b>NCT03214666</b>-single agent, phase I/II, recruiting; R/R AML, high risk MDS, advanced systemic mastocytosis</p>                                                                                                                                                                                                                                                                                                                                                                                                                                      | <p><b>Study ongoing</b></p>                                                                                     |

Vago and Gojo, Immune Escape and Immunotherapy of AML  
Supplementary Table 1 and 2

| Supplementary table 2. Checkpoint inhibitor studies in AML                                 |        |                                                                    |                                                                        |                          |
|--------------------------------------------------------------------------------------------|--------|--------------------------------------------------------------------|------------------------------------------------------------------------|--------------------------|
| Study ID                                                                                   | Ph     | Treatment                                                          | Patients                                                               | Clinical outcome /Status |
| <b>Monotherapy trials</b>                                                                  |        |                                                                    |                                                                        |                          |
|                                                                                            | I      | CT-011 (anti-PD1)                                                  | Advanced heme malignancies, including AML                              | Completed                |
| NCT02275533                                                                                | II     | Nivolumab (anti-PD1)                                               | AML in CR1/CRi1 with MRD excluding favorable AML in < 60 yrs old       | Recruiting               |
| NCT02532231                                                                                | II     | Nivolumab                                                          | AML in CR or < 10% blasts at high-risk for relapse                     | Recruiting               |
| NCT02708641                                                                                | II     | Pembroluzimab (anti-PD1)                                           | AML in CR1 (≥60 yrs), not candidate for alloHSCt                       | Recruiting               |
| NCT03286114                                                                                | I      | Pembroluzimab                                                      | Relapsed AML, MDS, ALL post alloHSCt                                   | Recruiting               |
| NCT02981914                                                                                | I      | Pembroluzimab                                                      | Relapsed AML, MDS, lymphoma post alloHSCt                              | Recruiting               |
| NCT03291353                                                                                | 0      | Pembroluzimab                                                      | Primary refractory AML                                                 | Withdrawn (slow accrual) |
| NCT01757639                                                                                | I      | Ipilimumab (anti-CTLA4)                                            | R/R high risk MDS and AML                                              | Completed                |
| NCT00060372                                                                                | I      | Ipilimumab                                                         | R/R AML plus other malignancies post alloHSCt                          | Completed                |
| <b>Combination of checkpoint inhibitors trials</b>                                         |        |                                                                    |                                                                        |                          |
| NCT01822509                                                                                | I/IB   | Ipilimumab or Nivolumab                                            | Relapsed heme malignancy post alloHSCt                                 | Active, non recruiting   |
| NCT03600155                                                                                | I      | Ipilimumab, Nivolumab, or both                                     | High-risk R/R AML/MDS after alloHSCt                                   | Recruiting               |
| NCT02846376                                                                                | I      | Ipilimumab, Nivolumab or both                                      | Post alloHSCt for int-2/high risk MDS/AML                              | Recruiting               |
| <b>Combination of checkpoint inhibitors with hypomethylating agents</b>                    |        |                                                                    |                                                                        |                          |
| NCT02397720                                                                                | II     | Nivolumab +/- Ipilimumab plus Azacitidine                          | R/R including post alloHSCt and untreated/unfit (≥65) AML              | Recruiting               |
| NCT03092674 SWOG 1612                                                                      | II/III | Nivolumab plus Azacitidine and other arms                          | Older (≥60), untreated AML and high risk MDS                           | Suspended                |
| NCT03825367                                                                                | I/II   | Nivolumab plus Azacitidine                                         | Pediatric R/R AML                                                      | Recruiting               |
| NCT02845297                                                                                | II     | Pembroluzimab plus Azacitidine                                     | R/R and untreated/unfit (≥65) AML                                      | Recruiting               |
| NCT03769532                                                                                | II     | Pembroluzimab plus Azacitidine                                     | NPM1mut AML in MRD+ CR                                                 | Planned                  |
| NCT02996474                                                                                | I/II   | Pembroluzimab plus Decitabine                                      | R/R AML                                                                | Completed                |
| NCT03969446                                                                                | I      | Pembroluzimab plus Decitabine                                      | R/R and untreated/unfit (≥60) AML                                      | Planned                  |
| NCT02892318                                                                                | I      | Atezolizumab (anti-PD-L1) plus Guadecitabine                       | R/R and untreated/unfit (≥65) AML                                      | Active, not recruiting   |
| NCT02953561                                                                                | IB/II  | Avelumab (anti-PD-L1) plus Azacitidine                             | R/R AML                                                                | Active, not recruiting   |
| NCT02775903                                                                                | II     | Durvalumab (anti-PD-L1) plus Azacitidine                           | Untreated (≥65) AML/high risk MDS                                      | Active, not recruiting   |
| NCT02890329                                                                                | I      | Ipilimumab plus Decitabine                                         | R/R including post alloHSCt and untreated (≥75) AML /R/R high risk MDS | Recruiting               |
| NCT03066648                                                                                | I      | PDR001 (anti-PD1) and MBG453 (anti-TIM3) alone, or plus decitabine | R/R and untreated, unfit AML /R/R and unfit high risk MDS              | Recruiting               |
| <b>Combination of checkpoint inhibitor with chemotherapy</b>                               |        |                                                                    |                                                                        |                          |
| NCT02464657                                                                                | I/II   | Nivolumab plus cytarabine and idarubicin                           | Untreated AML and high-risk MDS                                        | Active, not recruiting   |
| NCT02768792                                                                                | II     | Pembroluzimab plus HiDAC                                           | R/R AML                                                                | Active, not recruiting   |
| NCT03417154                                                                                | II     | Nivolumab plus oral cyclophosphamide                               | R/R AML and high-risk MDS                                              | Recruiting               |
| <b>Combination of checkpoint inhibitors with other therapeutics and immunotherapeutics</b> |        |                                                                    |                                                                        |                          |
| NCT04044209                                                                                | II     | Nivolumab plus Ivosidenib (IDH1 inhibitor)                         | R/R IDH1mut AML/high risk MDS                                          | Planned                  |
| NCT03730012                                                                                | I/II   | Atezolizumab plus Gilteritinib (FLT3 inhibitor)                    | R/R FLT3mut AML                                                        | Recruiting               |
| NCT03922477                                                                                | I      | Atezolizumab plus Hu5F9-G4 (anti-CD47)                             | R/R AML                                                                | Recruiting               |
| NCT03154827                                                                                | IB/II  | Atezolizumab plus BL-8040 (CXCR4 inhibitor)                        | AML-MRD+ CR1 p induction ≥60 yrs                                       | Recruiting               |
| NCT03940352                                                                                | I      | HDM201 (HDM2 inhibitor) plus MBG453 or venetoclax                  | R/R or unfit AML/R/R high risk MDS                                     | Recruiting               |
| NCT03390296                                                                                | IB/II  | Anti-OX40 alone or plus avelumab plus azacitidine and other arms   | R/R AML                                                                | Recruiting               |
| NCT03761914                                                                                | I/II   | Pembroluzimab plus galinpepimut-S (WT1 vaccine)                    | AML with PR on HMA (including induction chemo failure on HMA)          | Recruiting               |
| NCT01096602                                                                                | II     | Pidilizumab plus dendritic cell vaccine                            | AML patient in CR                                                      | Active, not recruiting   |
| NCT02771197                                                                                | II     | Pembroluzimab plus autologous SCT                                  | Non-favorable AML in ≥ CR1                                             | Recruiting               |
| NCT03912064                                                                                | I      | Ipilimumab + CD25/Treg-depleted DLI                                | Post-alloHSCt relapse AML/MDS/MPN                                      | Recruiting               |
